# Supplementary material
Source: PubMed Central journal article supplement (PMC6681979)
Supplement: ao9b01353_si_001.pdf [file ao9b01353_si_001.pdf]

## Supporting Information

### Cell-Derived Vesicles for *In Vitro* and *In Vivo* Targeted Therapeutic Delivery

Aaron A. Snell<sup>†</sup>, Khaga R. Neupane<sup>†</sup>, J. Robert McCorkle<sup>‡</sup>, Xu Fu<sup>†</sup>, Faruk H. Moonschi<sup>†</sup>, Elizabeth B. Caudill<sup>†</sup>, Jill Kolesar<sup>§</sup>, and Christopher I. Richards<sup>†\*</sup>

<sup>†</sup>. Department of Chemistry, University of Kentucky, Lexington, KY 40506

<sup>‡</sup>. Markey Cancer Center, University of Kentucky, Lexington, KY 40508

<sup>§</sup>. Department of Pharmacy Practice & Science, College of Pharmacy, University of Kentucky, Lexington, KY 40508.

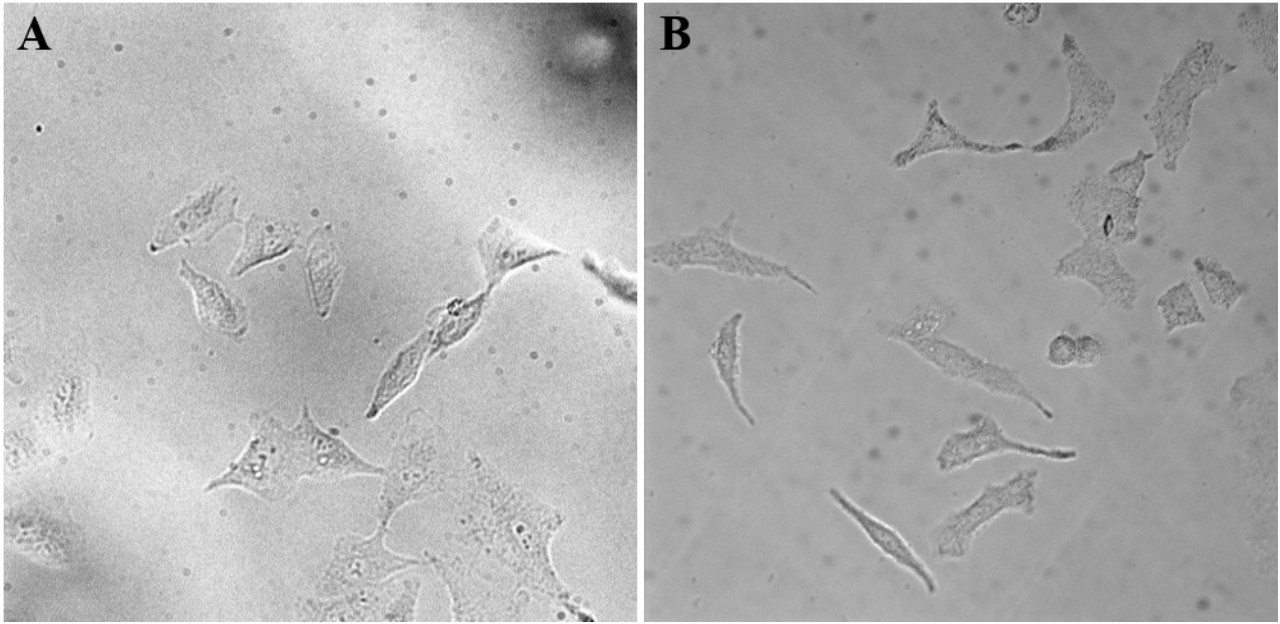

**Supplementary Figure 1.** Vesicle based gene delivery. (A) Brightfield image of HEK cells in the absence of plasmid. (B) Brightfield image of HEK cells after exposure to plasmid loaded vesicles
